# Supplementary material for: Deficiency of Splicing Factor 1 (SF1) Reduces Intestinal Polyp Incidence in ApcMin/+ Mice
Source: PubMed Central journal article supplement (PMC7697247; doi:10.3390/biology9110398), 2020-11-13

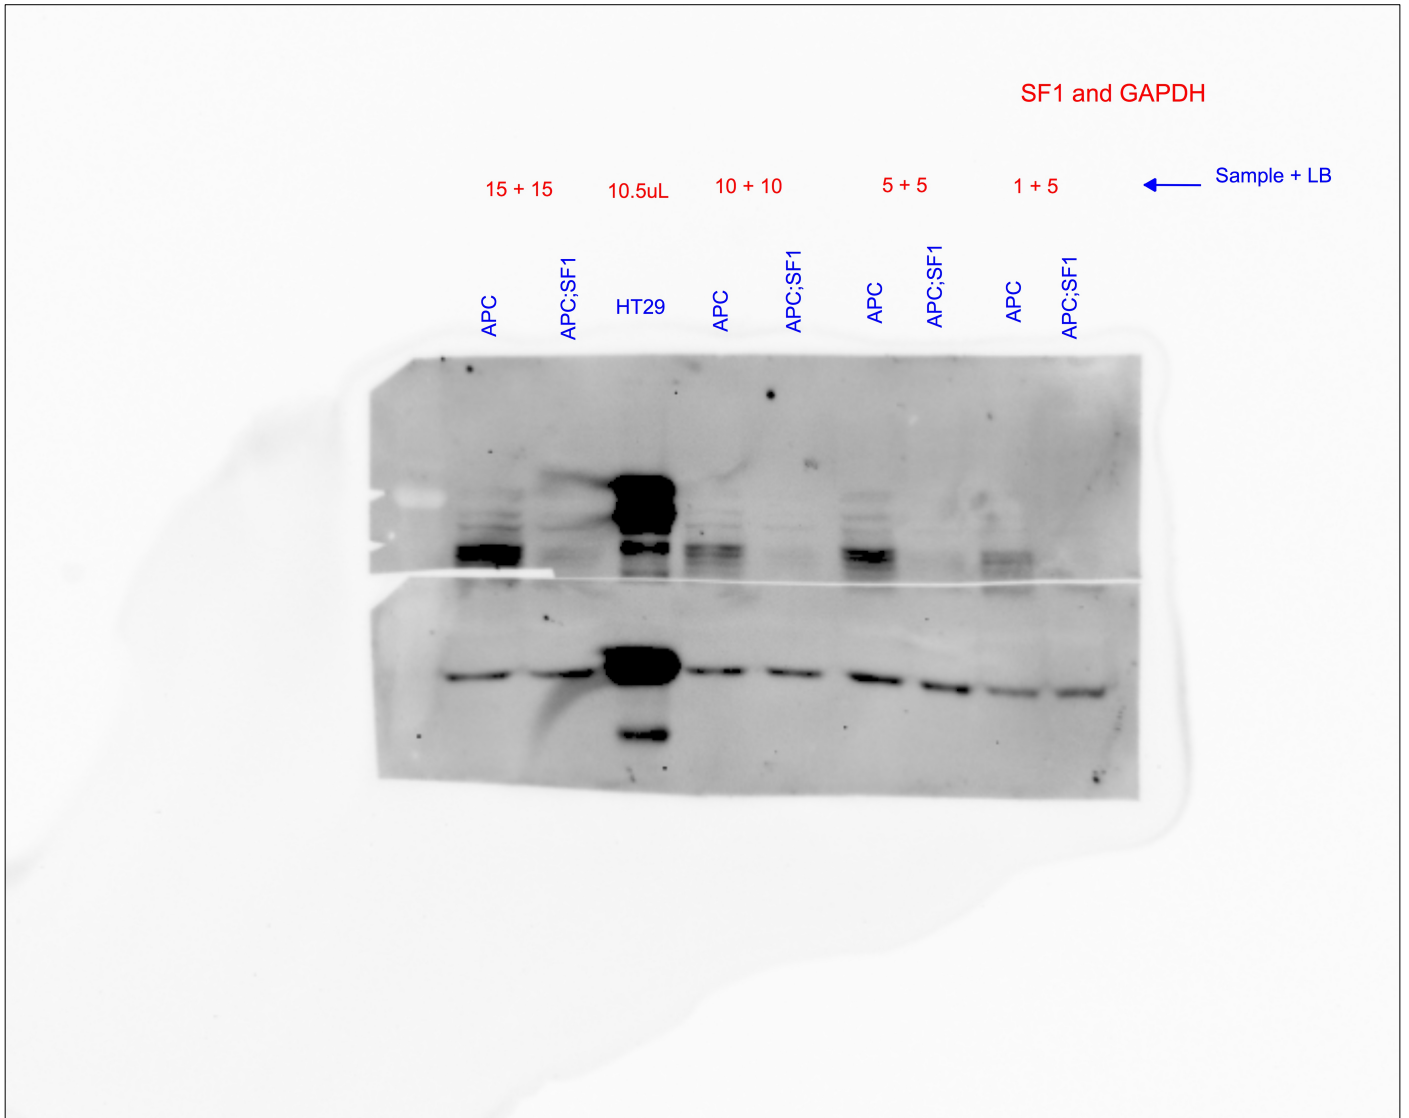

Supplement: biology-09-00398-s001.pdf [file biology-09-00398-s001.pdf]
